# Supplementary material
Source: HighWire-hosted journal article supplement (https://bmjopenquality.bmj.com/content/11/3/e001979)
Supplement: inline-supplementary-material-1 [file inline-supplementary-material-1.pdf]

### **People included in the Oversight and Stakeholder Team**

#### Oversight Team

- Clinical and Service Director
- Clinical Lead for PD
- Associate Director for Psychological Services
- Service Manager
- Governance and Performance Lead
- Administrator

#### Stakeholder Team

- Service User Representative
- Staff working across:
  - Primary Care
  - IAPT
  - Community Mental Health Teams
  - Crisis Response and Home Treatment Teams
  - Specialist PD service
  - Psychological Therapy service
  - Social Care
  - Mind (Mental Health Charity)
